# Supplementary material
Source: MDPI journal article supplement (https://www.mdpi.com/2673-6772/2/4/29)
Supplement: s1 [file s1]

## Supplementary Table S1

*Trypanosoma cruzi* and *Trypanosoma rangeli* isolates used in this study, host and geographic origin, genotyping, and SSU rRNA sequences used for phylogenetic inferences.

| Sample<br>TCC code <sup>a</sup> | Isolate <sup>b</sup> | Host species      | Geographic origin<br><br>State/country | Geno-<br>type        | SSU rRNA<br>Genbank<br>accession<br>number |            |
|---------------------------------|----------------------|-------------------|----------------------------------------|----------------------|--------------------------------------------|------------|
| <i>Trypanosoma cruzi</i>        |                      |                   |                                        |                      |                                            |            |
| BS                              | 33054                | human             | <i>Homo sapiens</i>                    | Acre/BR              | Tcl                                        | ON128739   |
| GS                              | Rro3AC               | triatomine        | <i>Rhodnius robustus</i>               | Acre/BR              | Tcl                                        | ON128741   |
| -                               | LBT7074              | bat               | <i>Artibeus lituratus</i>              | Acre/BR              | Tcl                                        | KY649124   |
| 262                             | AEAAB                | Non human primate | <i>Cebuella pygmaea</i>                | Acre/BR              | Tcl                                        | AY491763   |
| 331                             | AM-ANV               | Non human primate | <i>Sapajus apella</i>                  | Acre/BR              | Tcl                                        | EU755222   |
| -                               | LBT7097              | bat               | <i>Phyllostomus discolor</i>           | Acre/BR              | Tcl                                        | KY649140   |
| 1042                            | ROi 309              | triatomine        | <i>Rhodnius robustus</i> II            | Rondônia/BR          | Tcl                                        | = EU755225 |
| 649                             | Rr649                | triatomine        | <i>Rhodnius robustus</i> II            | Rondônia/BR          | Tcl                                        | EU755225   |
| 363                             | Roma06C              | didelphid         | <i>Didelphis marsupialis</i>           | Rondônia/BR          | Tcl                                        | FJ549375   |
| 640                             | 640                  | bat               | <i>Carollia perspicillata</i>          | Rondônia/BR          | Tcl                                        | FJ001633   |
| 642                             | 642                  | bat               | <i>Carollia perspicillata</i>          | Rondônia/BR          | Tcl                                        | FJ001624   |
| 30                              | G                    | didelphid         | <i>Didelphis marsupialis</i>           | Amazonas/BR          | Tcl                                        | AF239981   |
| 1339                            | Silviox10            | human             | <i>Homo sapiens</i>                    | Pará/BR              | Tcl                                        | AF303659   |
| 743                             | Cilene               | human             | <i>Homo sapiens</i>                    | Amazonas/BR          | Tcl                                        | EU755231   |
| 835                             | GSC                  | human             | <i>Homo sapiens</i>                    | Pará/BR              | Tcl                                        | EU755233   |
| 971                             | DRS                  | human             | <i>Homo sapiens</i>                    | Amapá/BR             | Tcl                                        | FJ549378   |
| 972                             | TCC972               | human             | <i>Homo sapiens</i>                    | Amapá/BR             | Tcl                                        | = FJ549378 |
| 803                             | TCC803               | human             | <i>Homo sapiens</i>                    | Pará/BR              | Tcl                                        | = EU755233 |
| 818                             | TCC818               | human             | <i>Homo sapiens</i>                    | Pará/BR              | Tcl                                        | = EU755234 |
| 34                              | Y                    | human             | <i>Homo sapiens</i>                    | São Paulo/BR         | TcII                                       | AF301912   |
| 844                             | IM-3869              | human             | <i>Homo sapiens</i>                    | Amazonas/BR          | TcIII                                      | AF303660   |
| 2123                            | M6241 cl6            | human             | <i>Homo sapiens</i>                    | Pará/BR              | TcIII                                      | AY785578   |
| 845                             | MT3663               | triatomine        | <i>Panstrongylus geniculatus</i>       | Amazonas/BR          | TcIII                                      | AF288660   |
| BS                              | 33052                | human             | <i>Homo sapiens</i>                    | Acre/BR              | TcIV                                       | ON128740   |
| 337                             | fuscilis 15          | Non human primate | <i>Saguinus fuscicollis</i>            | Acre/BR              | TcIV                                       | EU755223   |
| 338                             | labiatus 17          | Non human primate | <i>Saguinus labiatus labiatus</i>      | Acre/BR              | TcIV                                       | AY491762   |
| -                               | LBT5009              | bat               | <i>Artibeus lituratus</i>              | Acre/BR              | TcIV                                       | KY748356   |
| -                               | LBT5060              | bat               | <i>Phyllostomus hastatus</i>           | Acre/BR              | TcIV                                       | KY748354   |
| BS                              | cujubim              | human             | <i>Homo sapiens</i>                    | Rondonia/BR          | TcIV                                       | = AJ009148 |
| 661                             | Rr661                | triatomine        | <i>Rhodnius robustus</i> II            | Rondonia/BR          | TcIV                                       | EU755226   |
| 698                             | Rr698                | triatomine        | <i>Rhodnius robustus</i> II            | Rondonia/BR          | TcIV                                       | EU755228   |
| GS                              | Pgen cujumim         | triatomine        | <i>Panstrongylus geniculatus</i>       | Rondonia/BR          | TcIV                                       | = AJ009148 |
| 463                             | 2440                 | Non human primate | <i>Cebus olivaceus</i>                 | Amazonas/BR          | TcIV                                       | EU755224   |
| 2124                            | CanIII               | human             | <i>Homo sapiens</i>                    | Pará/BR              | TcIV                                       | AJ009148   |
| 85                              | JJ                   | human             | <i>Homo sapiens</i>                    | Amazonas/BR          | TcIV                                       | AY491761   |
| 1434                            | RBS 3676-XE:4766     | human             | <i>Homo sapiens</i>                    | Amapá/BR             | TcIV                                       | EU755244   |
| 1805                            | JSS-7739/3245        | human             | <i>Homo sapiens</i>                    | Pará/BR              | TcIV                                       | = AJ009148 |
| 778                             | 4167                 | triatomine        | <i>Rhodnius brethesi</i>               | Amazonas/BR          | TcIV                                       | EU755232   |
| -                               | monkey               | Non human primate | <i>Macaca mulatta</i>                  | USA                  | TcIVNA                                     | AJ620544   |
| -                               | 91122102R            | carnivore         | <i>Procyon lotor</i>                   | USA                  | TcIVNA                                     | FJ555628   |
| 967                             | NRcl3                | human             | <i>Homo sapiens</i>                    | Chile                | TcV                                        | AF228685   |
| 186                             | Tunalito             | triatomine        | <i>Triatoma infestans</i>              | Bolivia              | TcV                                        | FJ001630   |
| -                               | Peru                 | human             | <i>Homo sapiens</i>                    | Peru                 | TcVI                                       | X53917     |
| -                               | CL Brener            | triatomine        | <i>Triatoma infestans</i>              | Rio Grande do Sul/BR | TcVI                                       | AF245383   |
|                                 |                      |                   |                                        |                      |                                            |            |

| <b><i>Trypanosoma rangeli</i></b> |                |                   |                                   |                       |     |            |
|-----------------------------------|----------------|-------------------|-----------------------------------|-----------------------|-----|------------|
| 353                               | Maloch-05      | Non human primate | <i>Callicebus cupreus</i>         | Acre/BR               | TrA | AY491750   |
| -                                 | LBT 5428       | bat               | <i>Artibeus planirostris</i>      | Acre/BR               | TrA | KY649155   |
| -                                 | LBT 5472       | bat               | <i>Carollia perspicillata</i>     | Acre/BR               | TrA | KY649114   |
| -                                 | C750           | dog               | <i>Canis familiaris</i>           | Acre/BR               | TrA | MN649017   |
| 704                               | ROR-85         | triatomine        | <i>Rhodnius robustus</i> II       | Rondonia/BR           | TrA | EF071579   |
| 667                               | ROR-20         | triatomine        | <i>Rhodnius robustus</i> II       | Rondonia/BR           | TrA | EF071577   |
| 369                               | Roma01         | didelphid         | <i>Didelphis marsupialis</i>      | Rondonia/BR           | TrA | AY491748   |
| 382                               | Roma06         | didelphid         | <i>Didelphis marsupialis</i>      | Rondonia/BR           | TrA | AY491749   |
| 202                               | AT-ADS         | Non human primate | <i>Saimiri sciureus</i>           | Pará/BR               | TrA | AY491746   |
| 220                               | AT-AEI         | Non human primate | <i>Saimiri sciureus</i>           | Pará/BR               | TrA | AY491747   |
| 422                               | 2532           | Non human primate | <i>Cebus albifrons</i>            | Amazonas/BR           | TrA | = AY491746 |
| 20                                | Macias         | human             | <i>Homo sapiens</i>               | Venezuela             | TrA | AJ012415   |
| 31                                | SanAugustin    | human             | <i>Homo sapiens</i>               | Colombia              | TrA | AJ012417   |
| BS                                | 33053          | human             | <i>Homo sapiens</i>               | Acre/BR               | TrB | ON128738   |
| 232                               | 11841          | Non-human primate | <i>Saguinus labiatus</i>          | Acre/BR               | TrB | ON128743   |
| 235                               | 46388          | Non-human primate | <i>Saguinus fuscicollis</i>       | Acre/BR               | TrB | ON128742   |
| 233                               | 11049          | Non-human primate | <i>Saguinus labiatus labiatus</i> | Acre/BR               | TrB | AY491756   |
| 207                               | AE-AAA         | Non-human primate | <i>Cebuella pygmaea</i>           | Acre/BR               | TrB | AY491752   |
| 194                               | AE-AAB         | Non-human primate | <i>Cebuella pygmaea</i>           | Acre/BR               | TrB | AY491753   |
| 205                               | M12229         | Non-human primate | <i>Aotus sp</i>                   | Amazonas/BR           | TrB | AY491757   |
| 86                                | AM80           | human             | <i>Homo sapiens</i>               | Amazonas/BR           | TrB | AY491766   |
| 261                               | AM11           | human             | <i>Homo sapiens</i>               | Amazonas/BR           | TrB | AY491758   |
|                                   | 4176           | triatomine        | <i>Rhodnius brethesi</i>          | Amazonas/BR           | TrB | EF071580   |
| 759                               | 4167           | triatomine        | <i>Rhodnius brethesi</i>          | Amazonas/BR           | TrB | = EF71580  |
| 13                                | preguici       | sloth             | <i>Choloepus didactylus</i>       | Pará/BR               | TrB | AY491767   |
| 10                                | legeri         | anteater          | <i>Tamandua tetradactyla</i>      | Pará/BR               | TrB | AY491769   |
| -                                 | PG             | human             | <i>Homo sapiens</i>               | Panama                | TrC | AJ012416   |
| -                                 | Bg-60          | human             | <i>Homo sapiens</i>               | Costa Rica            | TrC | X62675     |
| 328                               | 1625           | human             | <i>Homo sapiens</i>               | Salvador              | TrC | AY491738   |
| -                                 | SO29           | triatomine        | <i>Rhodnius pallescens</i>        | Colombia              | TrC | EF071581   |
| -                                 | RGB            | dog               | <i>Canis familiaris</i>           | Venezuela             | TrC | AJ009160   |
| -                                 | G5             | triatomine        | <i>Rhodnius pallescens</i>        | Colombia              | TrC | EF071582   |
| -                                 | 043AJGuanabano | bat               | <i>Artibeus jamaicensis</i>       | Panama                | TrC | KM406901   |
| 900                               | IM 5140        | triatomine        | <i>Rhodnius pictipes</i>          | Amazonas/BR           | TrE | KT368799   |
| -                                 | C170           | didelphid         | <i>Philander opossum</i>          | Pará/BR               | TrE | MN649026   |
| 643                               | 643            | bat               | <i>Platyrrhinus lineatus</i>      | Mato Grosso do Sul/BR | TrE | EU867803   |
| 23                                | SC-58          | rodent            | <i>Echimys dasythrix</i>          | Santa Catarina/BR     | TrD | AY491745   |
| -                                 | C593           | bat               | <i>Carollia perspicillata</i>     | Espírito Santo/BR     | TrD | MF141848   |
|                                   |                |                   |                                   |                       |     |            |
| <b><i>T. conorhini</i></b>        | BR1            | Rodent            | <i>Rattus rattus</i>              | Pará/BR               |     | AJ012411   |
| <b><i>T.c. marinkellei</i></b>    | ROMo 114       | bat               | <i>Carollia perspicillata</i>     | Rondônia/BR           |     | FJ001664   |

BS, blood sample, GS, triatomine gut sample. <sup>a</sup>, TCC, Code numbers of the isolates cryopreserved in the Trypanosomatid Culture Collection (TCC), Department of Parasitology, University of São Paulo, São Paulo, Brazil (BR). <sup>b</sup>, field codes of the isolates.
